# Supplementary material for: On the mechanism of inter-cluster alloying reactions: two-stage metal exchange of [Au25(PET)18]−and [Ag25(DMBT)18]−clusters
Source: Royal Society of Chemistry journal article supplement (doi:10.1039/d0ta02352c), 2020-01-01
Supplement: d0ta02352c1.pdf [file d0ta02352c1.pdf]

## Supporting Information

### On the Mechanism of Inter-Cluster Alloying Reaction: Two-Stage Metal Exchange of $[\text{Au}_{25}(\text{PET})_{18}]^-$ and $[\text{Ag}_{25}(\text{DMBT})_{18}]^-$ Clusters

Baoyu Huang and Yong Pei\*

Department of Chemistry, Key Laboratory of Environmentally Friendly Chemistry and Applications of Ministry of Education, Key Laboratory for Green Organic Synthesis and Application of Hunan Province, Xiangtan University, Hunan Province 411105, China

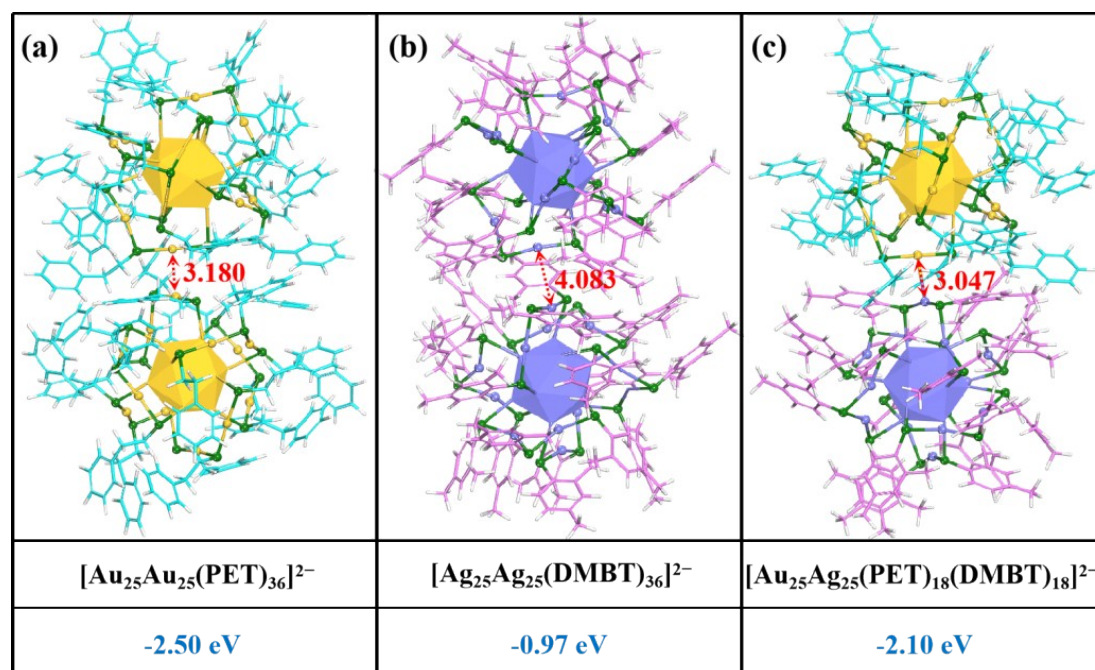

**Figure S1** Optimized structure and binding energy of (a)  $[\text{Au}_{25}\text{Au}_{25}(\text{PET})_{36}]^{2-}$  (b)  $[\text{Ag}_{25}\text{Ag}_{25}(\text{DMBT})_{36}]^{2-}$  and (c)  $[\text{Au}_{25}\text{Ag}_{25}(\text{PET})_{18}(\text{DMBT})_{18}]^{2-}$ . The icosahedral  $\text{M}_{13}$  ( $\text{M} = \text{Au}/\text{Ag}$ ) core is represented by a polyhedron.

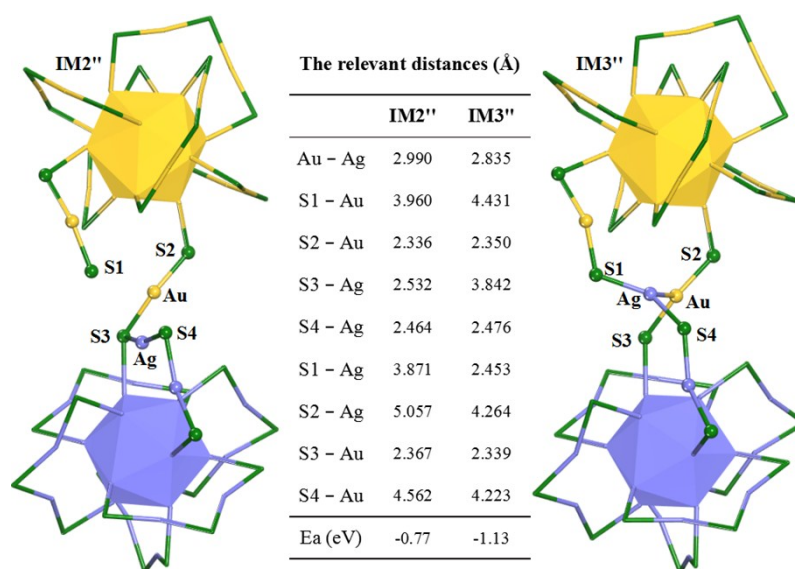

**Figure S2** The structures and bond length parameters of **IM2''** and **IM3''**. The ligand R groups have been removed for clarity.

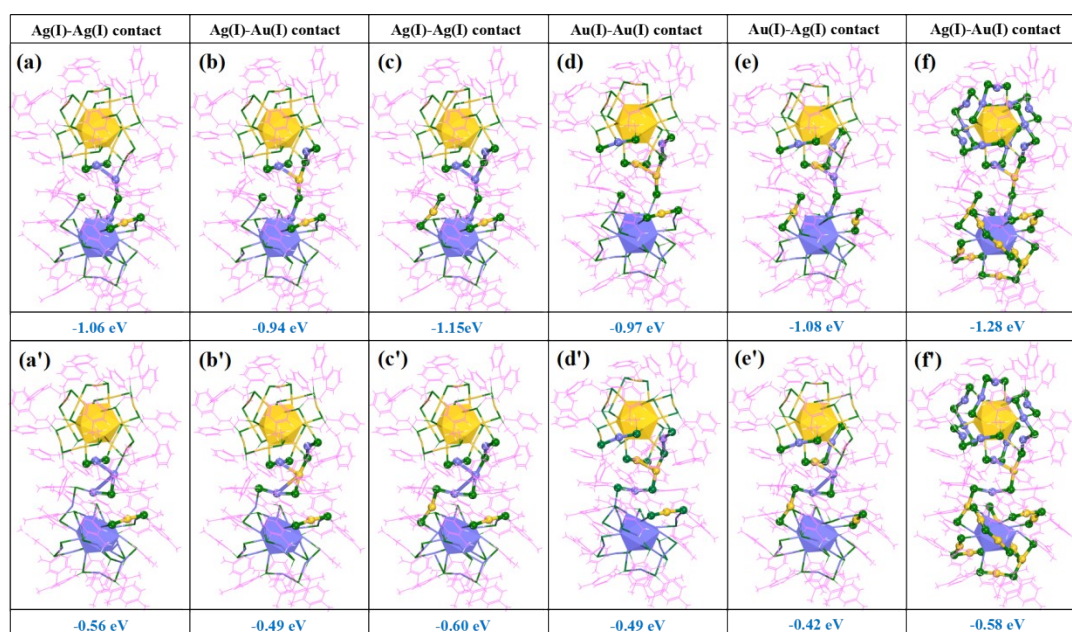

**Figure S3** The optimization structures and relative energies of the intermediates (a-f) with and (a'-f') without the migration of a metal core Ag(0) atoms. The R groups are removed for clarity, and the icosahedral  $M_{13}$  ( $M = \text{Au/Ag}$ ) cores are represented by polyhedron. Colour code for the atoms: Au (yellow), Ag (purple) and S (green), C(pink), H(white).
